# Supplementary material
Source: Springer Nature journal article supplement (https://www.springermedizin.de/resource/supplementary/12943_2009_565_MOESM7_ESM.pdf/9554982)

### A. RT-PCR

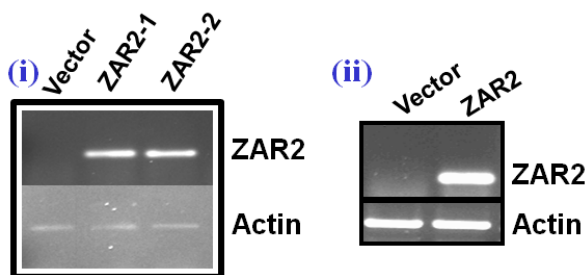

### D. Dual staining of MCF7 cells for FLAG-ZAR2 (red) and cyclin A (green).

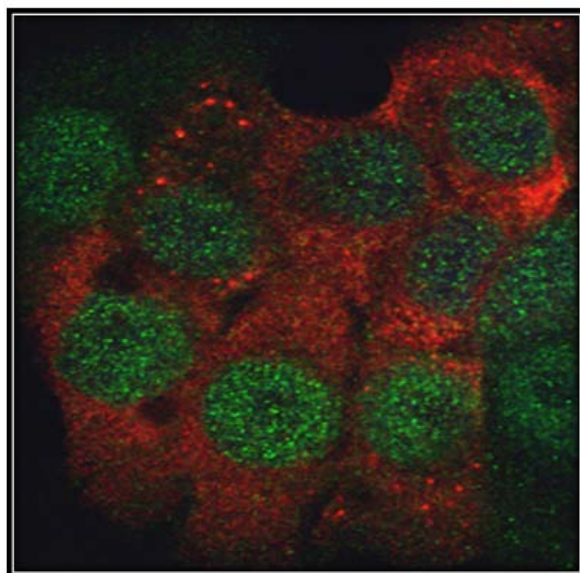

### B. Western Blot

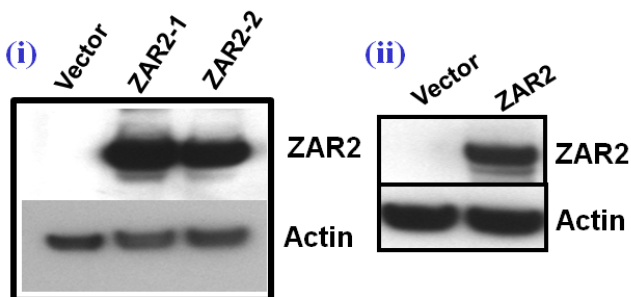

### C. Immunofluorescence

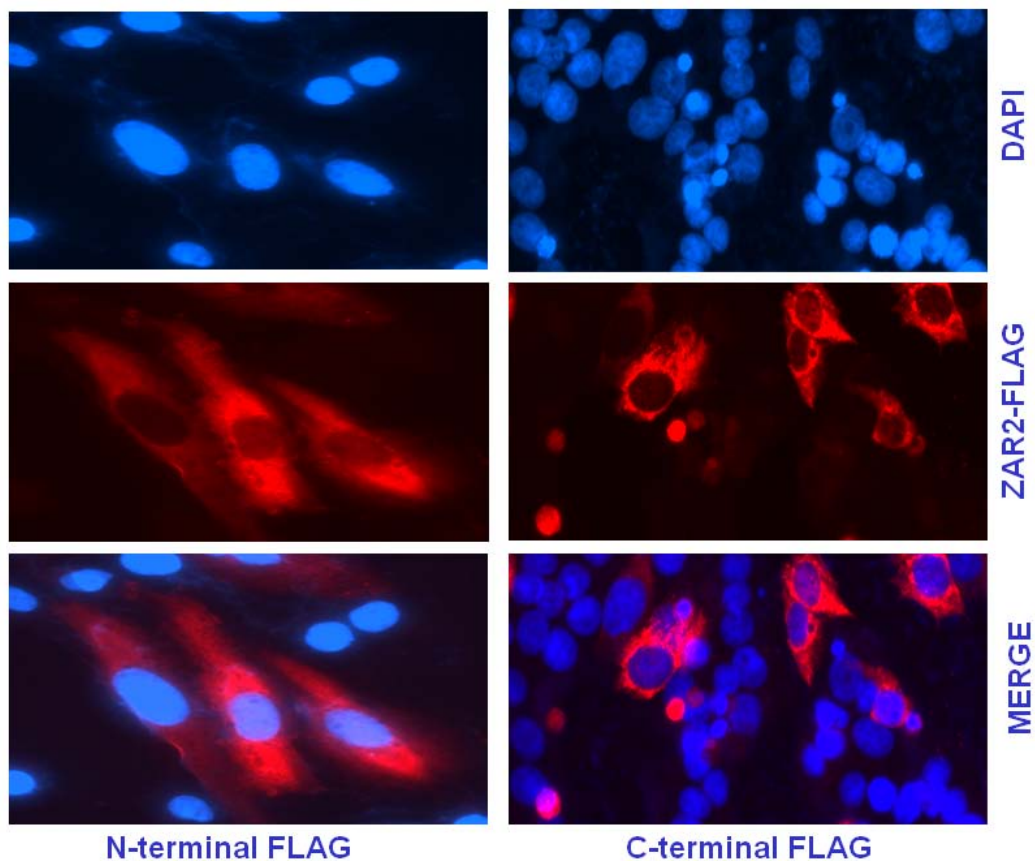

Supplement: MOESM7 [file 9554982]
